# Supplementary material for: Structure Elucidation of the Metabolites of 2', 3', 5'-Tri-O-Acetyl-N 6-(3-Hydroxyphenyl) Adenosine in Rat Urine by HPLC-DAD, ESI-MS and Off-Line Microprobe NMR
Source: PubMed Central journal article supplement (PMC4451981; doi:10.1371/journal.pone.0127583), 2015-06-01

## S4 File. The NMR spectra of M4.

Fig. S4-1  $^1\text{H}$  NMR spectrum of M4 (500 MHz, DMSO, 25  $^\circ\text{C}$ ).

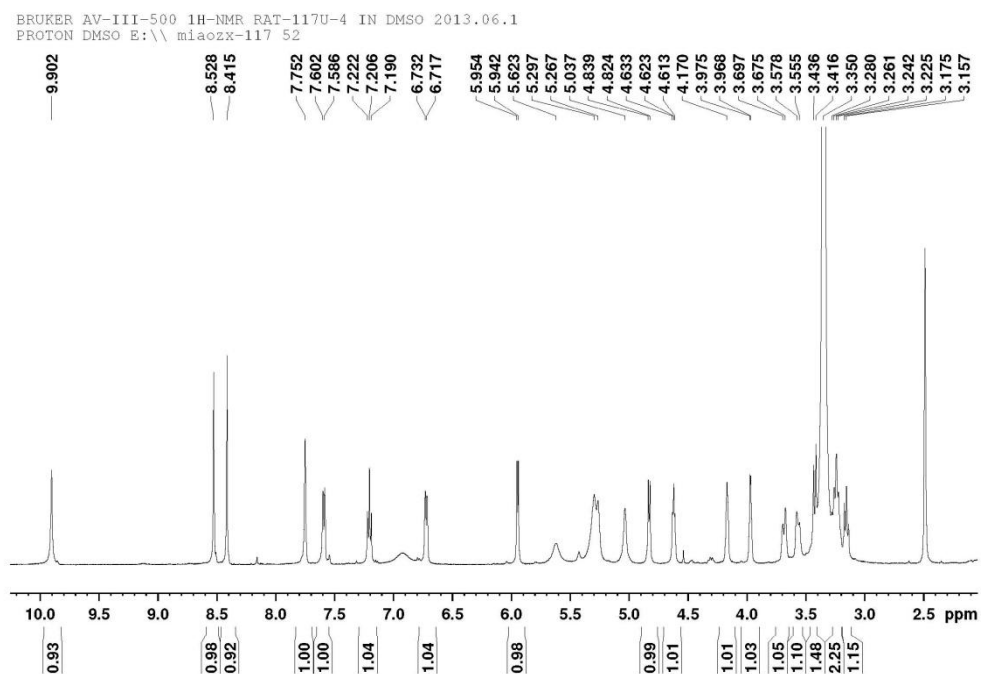

Fig. S4-2  $^1\text{H}$  NMR spectrum of M4 (500 MHz, DMSO, 25  $^\circ\text{C}$ ).

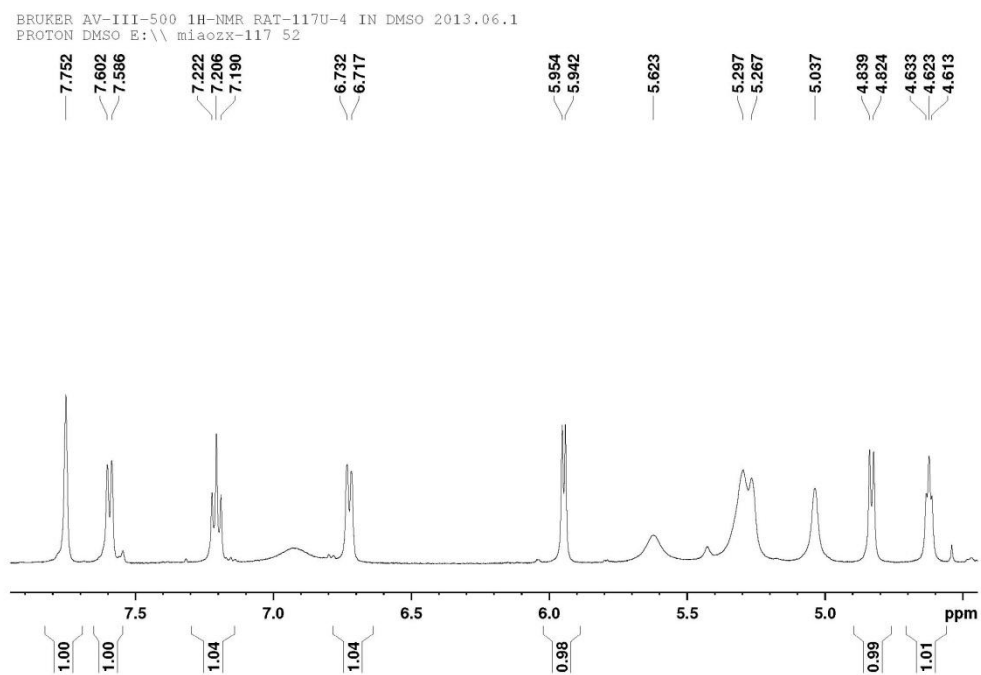

**Fig. S4-3**  $^1\text{H}$  NMR spectrum of M4 (500 MHz, DMSO, 25  $^\circ\text{C}$ ).

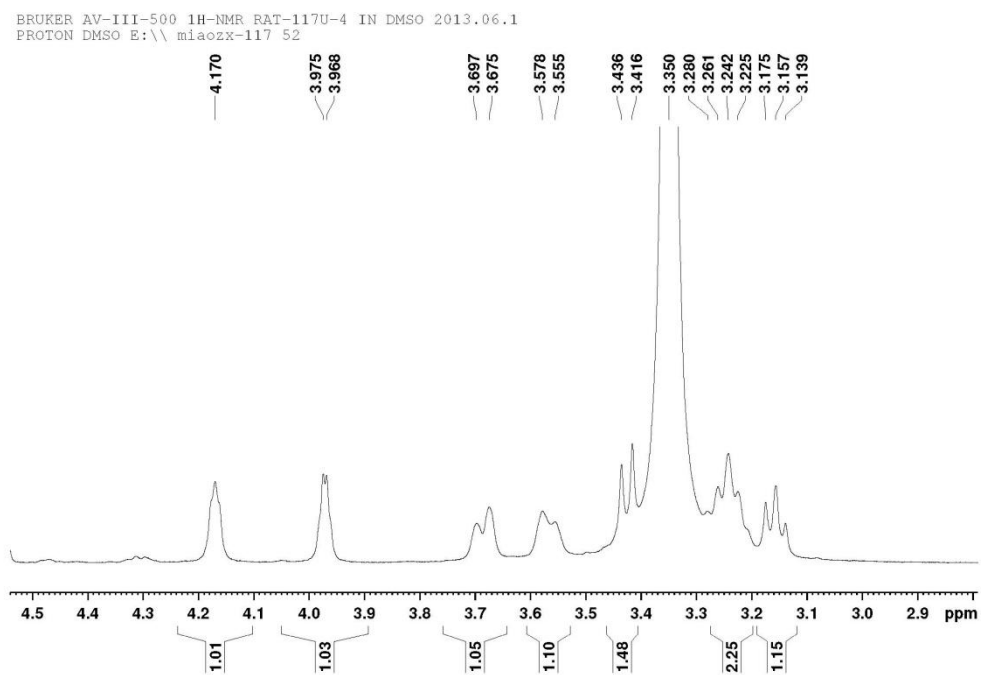

**Fig. S4-4**  $^{13}\text{C}$  NMR spectrum of M4 (500 MHz, DMSO, 25  $^\circ\text{C}$ ).

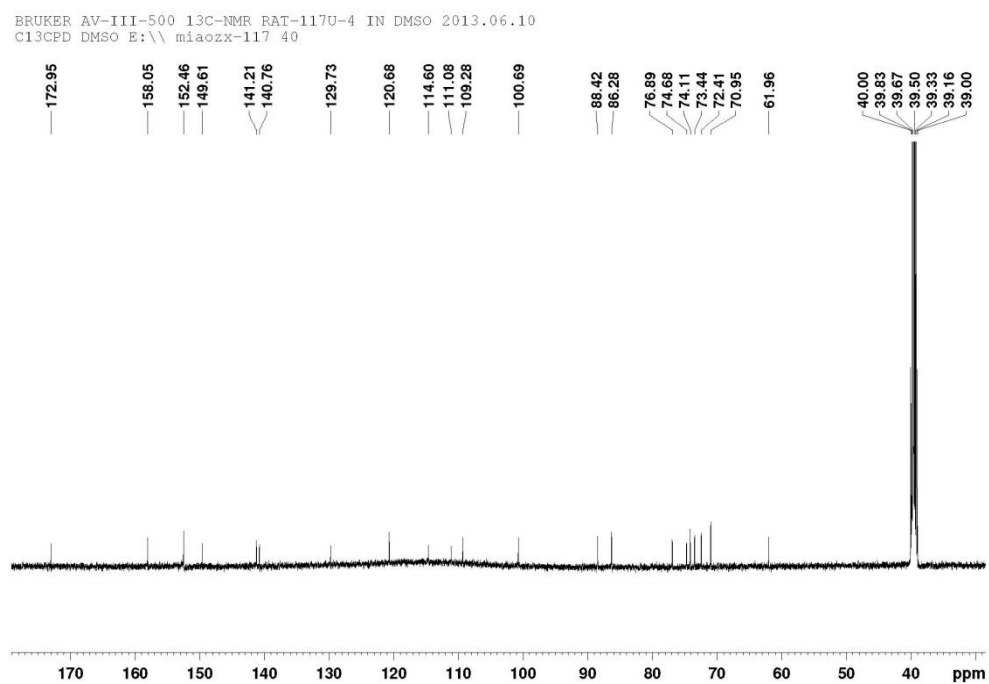

Fig. S4-5 COSY NMR spectrum of M4 (500 MHz, DMSO, 25 °C).

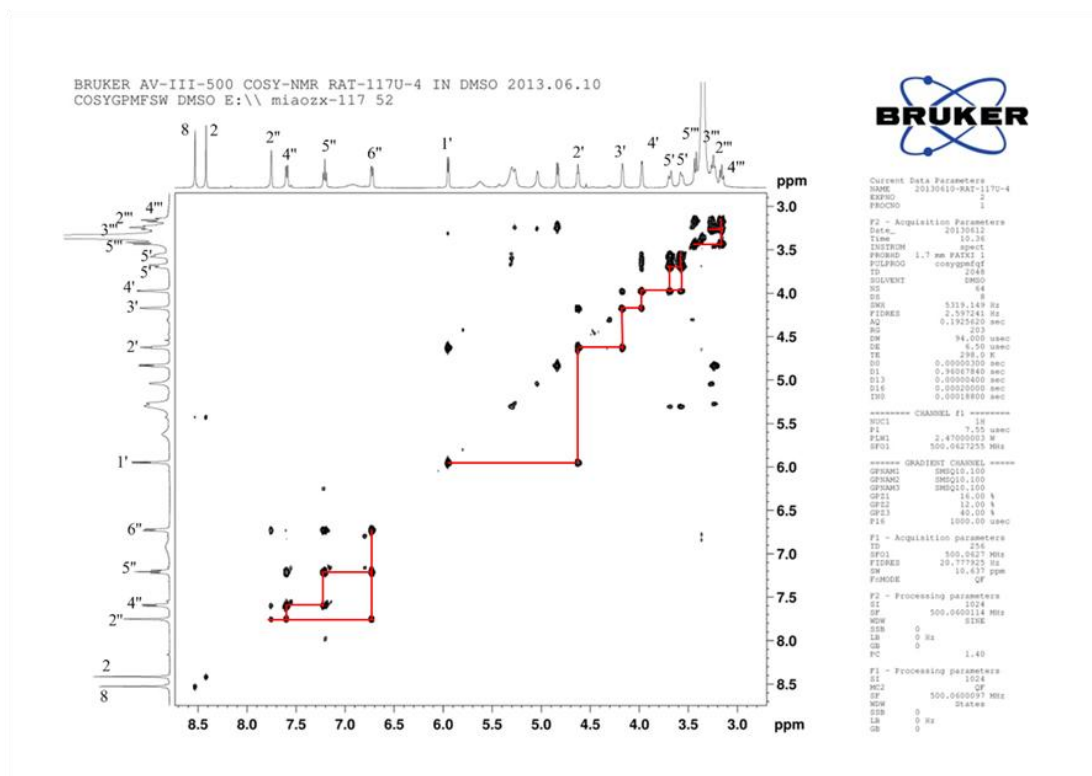

Fig. S4-6 COSY NMR spectrum of M4 (500 MHz, DMSO, 25 °C).

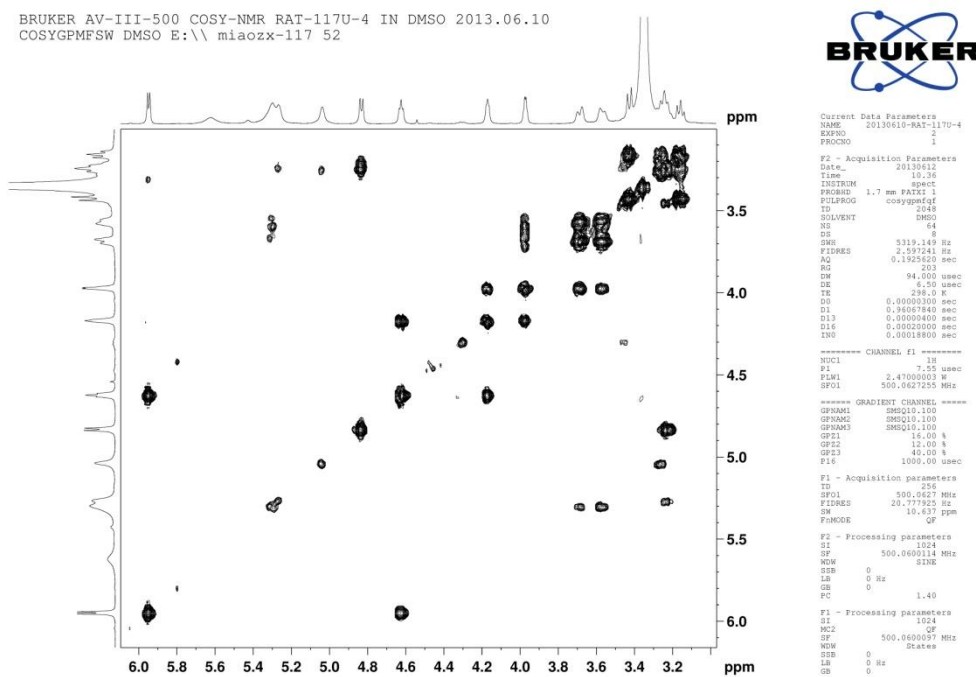





Fig. S4-11 HMBC NMR spectrum of M4 (500 MHz, DMSO, 25 °C).

BRUKER AV-III-500 HMBC-NMR RAT-117U-4 IN DMSO 2013.06.10  
 HMBCGPN2 DMSO E:\miaozx-117 40

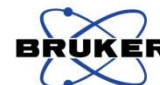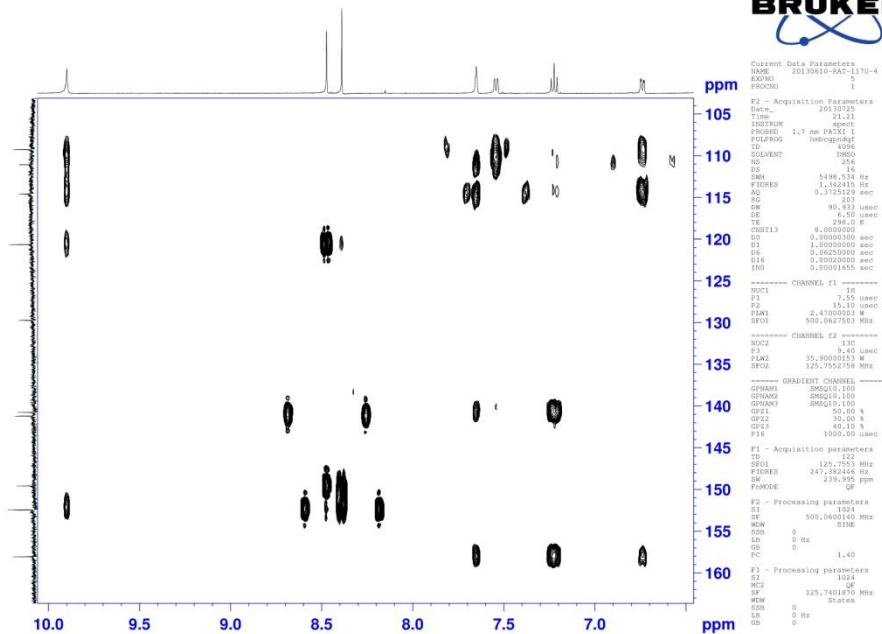

Fig. S4-12 HMBC NMR spectrum of M4 (500 MHz, DMSO, 25 °C).

BRUKER AV-III-500 HMBC-NMR RAT-117U-4 IN DMSO 2013.06.10  
 HMBCGPN2 DMSO E:\miaozx-117 40

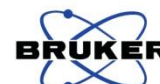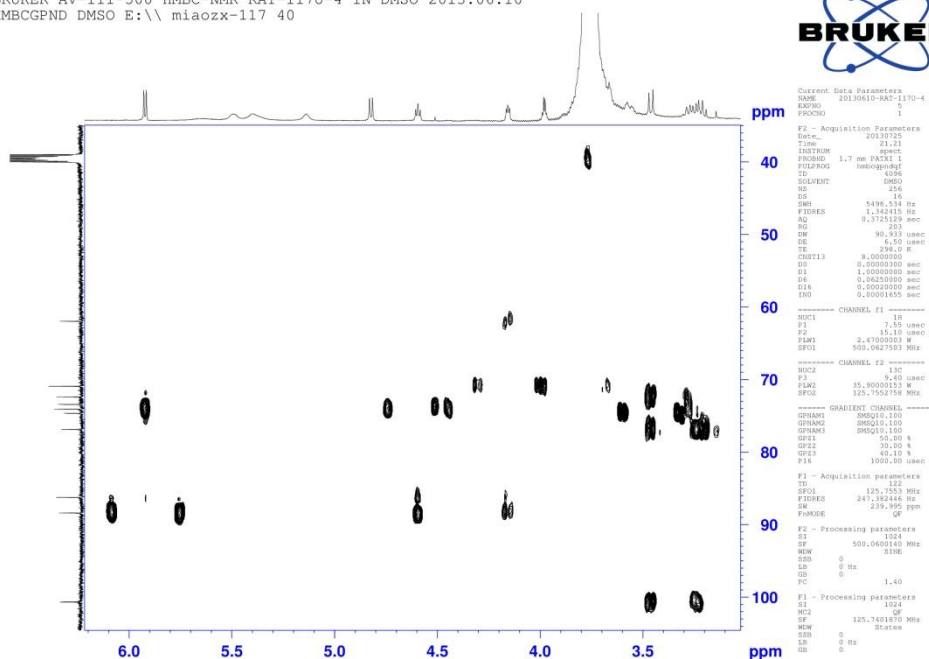

Fig. S4-13 HMBC NMR spectrum of M4 (500 MHz, DMSO, 25 °C).

BRUKER AV-III-500 HMBC-NMR RAT-117U-4 IN DMSO 2013.06.10  
 HMBCGPND DMSO E:\ miaoqx-117 40

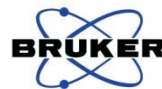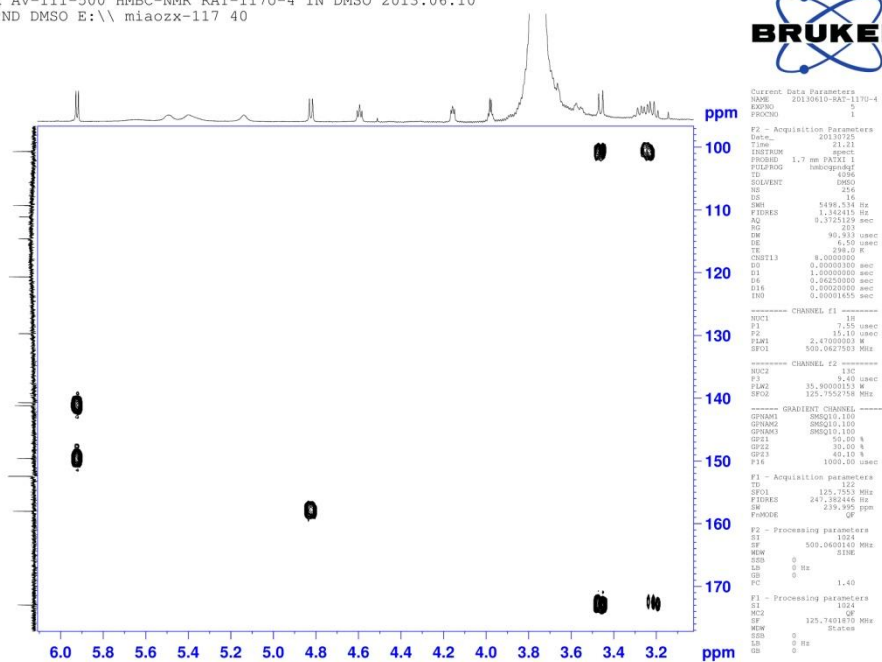

Supplement: pone.0127583.s004.pdf [file pone.0127583.s004.pdf]
