# Supplementary material for: Structure Elucidation of the Metabolites of 2', 3', 5'-Tri-O-Acetyl-N 6-(3-Hydroxyphenyl) Adenosine in Rat Urine by HPLC-DAD, ESI-MS and Off-Line Microprobe NMR
Source: PubMed Central journal article supplement (PMC4451981; doi:10.1371/journal.pone.0127583), 2015-06-01

## S2 File. The NMR spectra of M2.

Fig. S2-1  $^1\text{H}$  NMR spectrum of M2 (500 MHz, DMSO, 25  $^\circ\text{C}$ ).

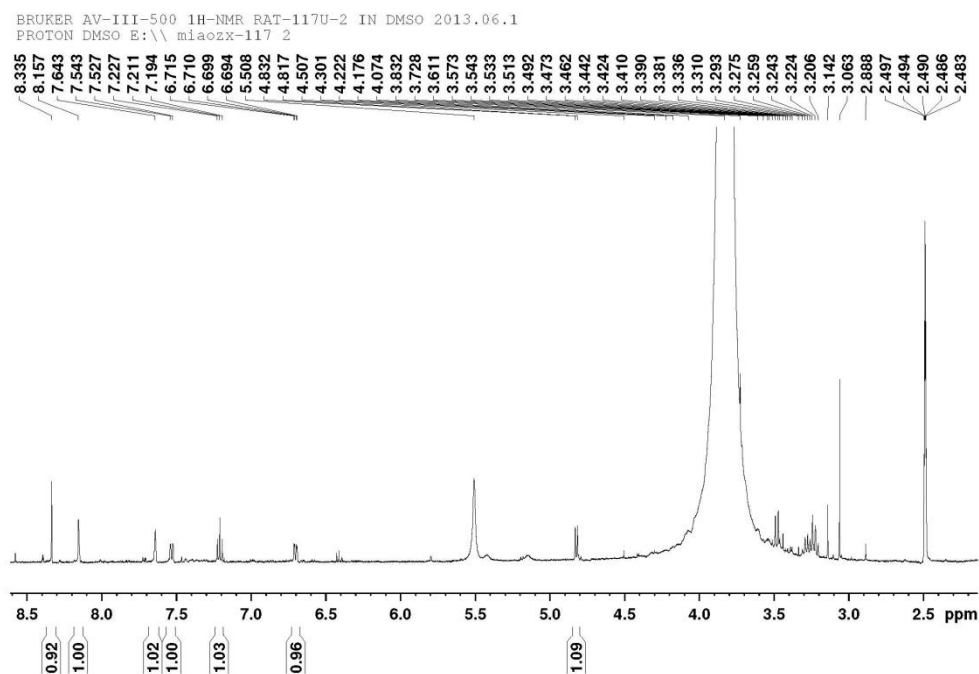

Fig. S2-2  $^1\text{H}$  NMR spectrum of M2 (500 MHz, DMSO, 25  $^\circ\text{C}$ ).

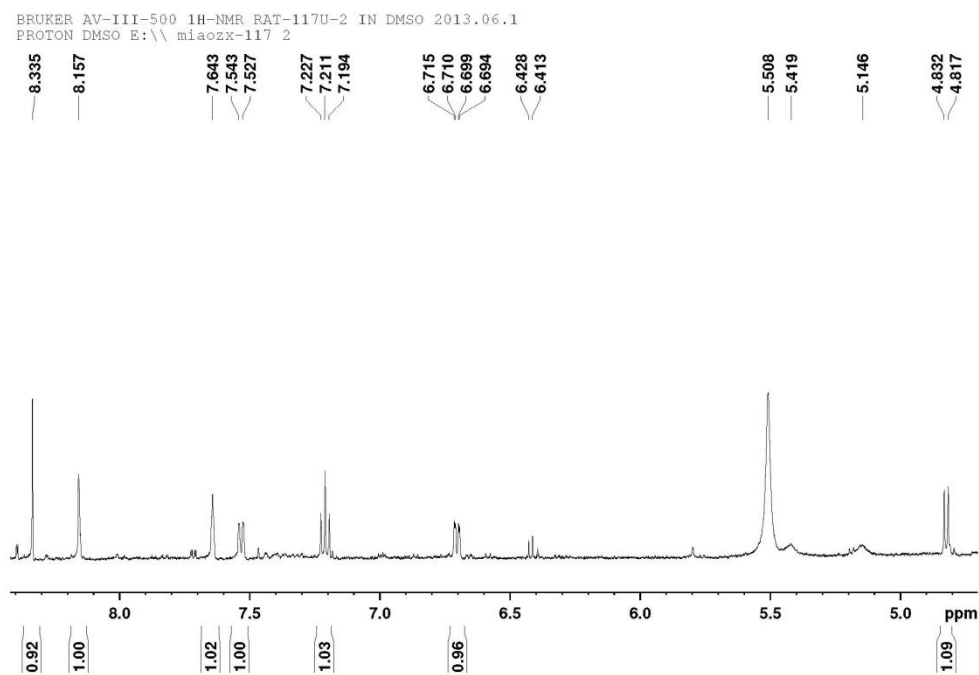

**Fig. S2-3** COSY NMR spectrum of M2 (500 MHz, DMSO, 25 °C).

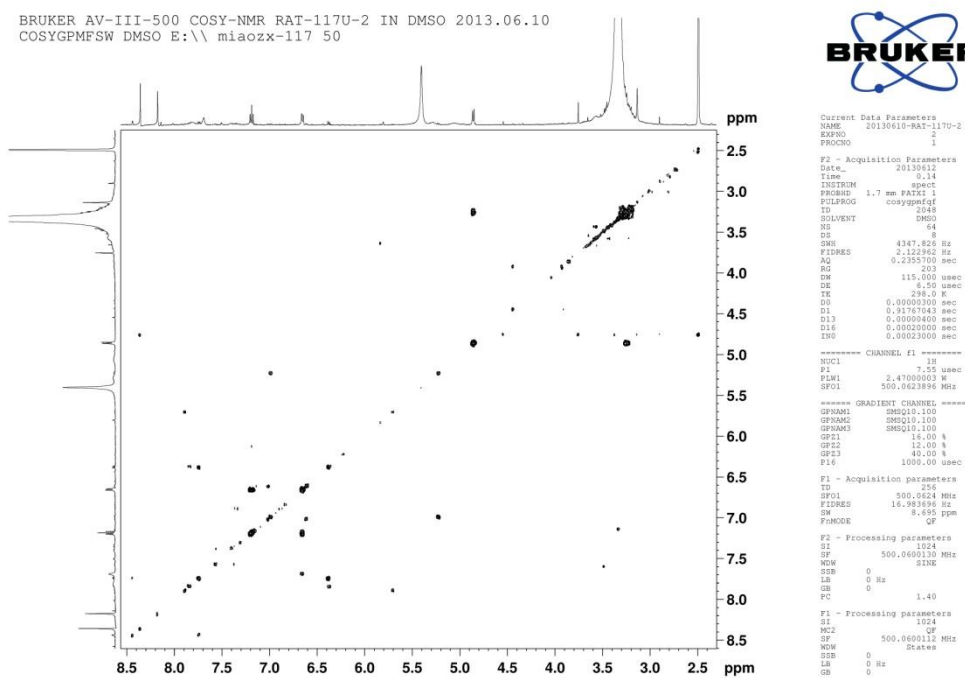

**Fig. S2-4** HSQC NMR spectrum of M2 (500 MHz, DMSO, 25 °C).

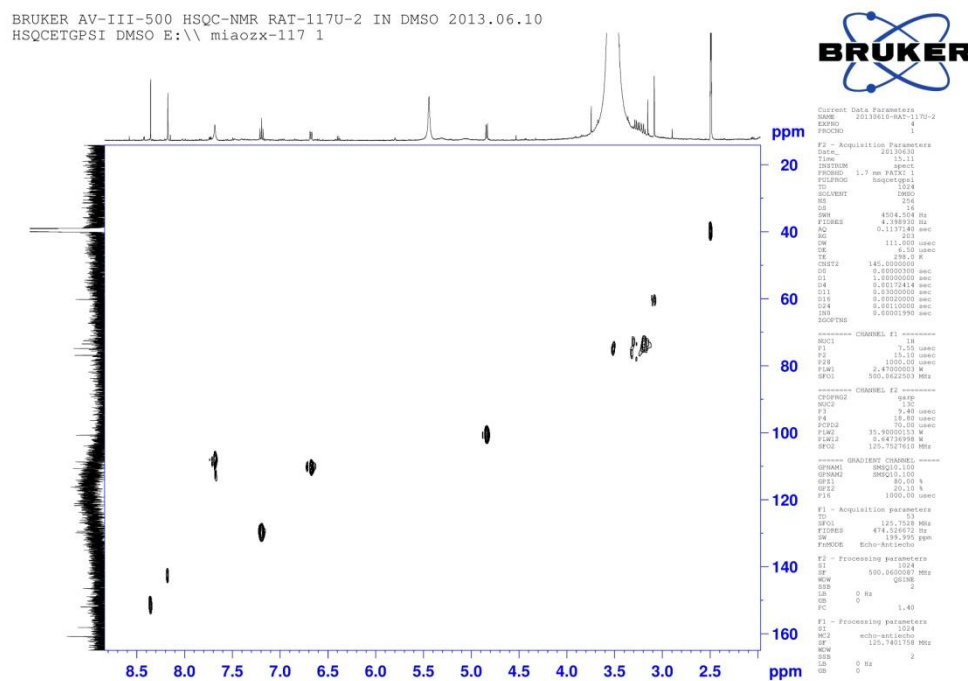

Fig. S2-5 HMBC NMR spectrum of M2 (500 MHz, DMSO, 25 °C).

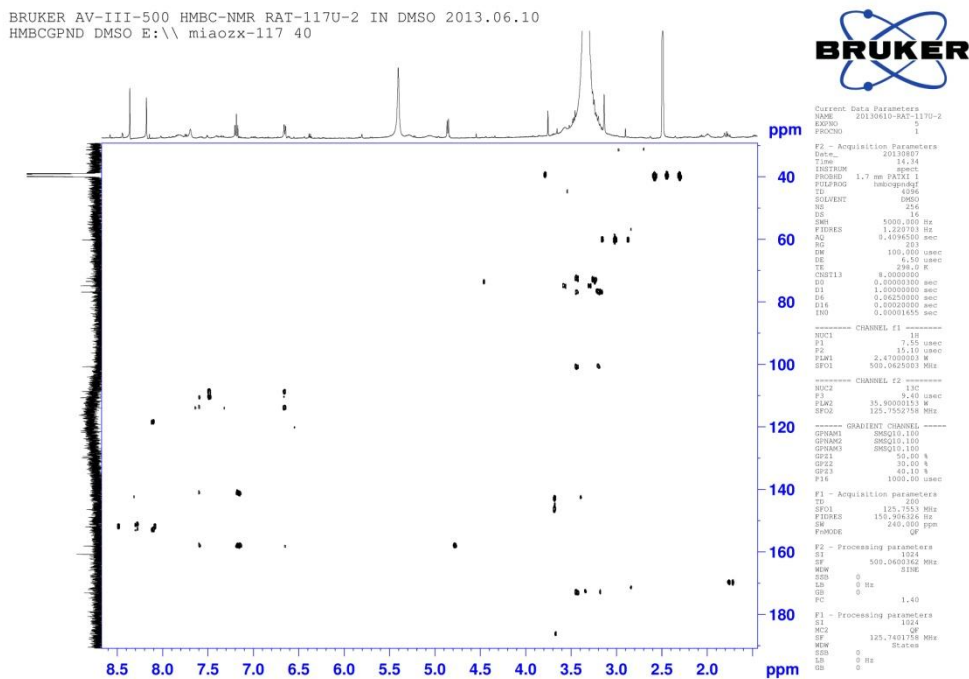

Fig. S2-6 HMBC NMR spectrum of M2 (500 MHz, DMSO, 25 °C).

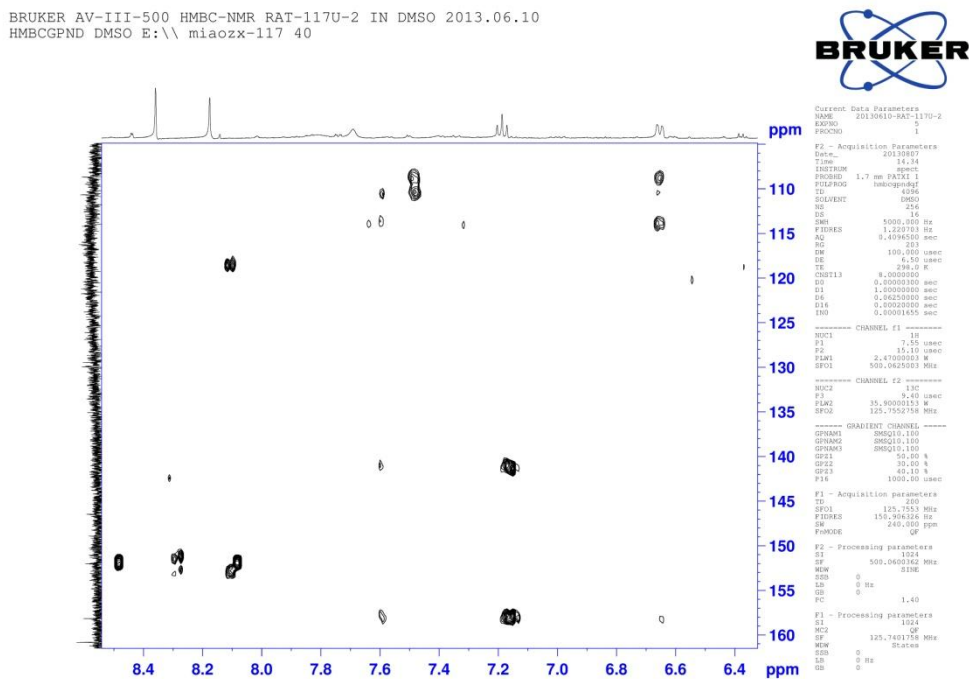

Supplement: pone.0127583.s002.pdf [file pone.0127583.s002.pdf]
