# Supplementary material for: Structure Elucidation of the Metabolites of 2', 3', 5'-Tri-O-Acetyl-N 6-(3-Hydroxyphenyl) Adenosine in Rat Urine by HPLC-DAD, ESI-MS and Off-Line Microprobe NMR
Source: PubMed Central journal article supplement (PMC4451981; doi:10.1371/journal.pone.0127583), 2015-06-01

### S3 File. The NMR spectra of M3.

Fig. S3-1  $^1\text{H}$  NMR spectrum of M3 (500 MHz, DMSO, 25  $^\circ\text{C}$ ).

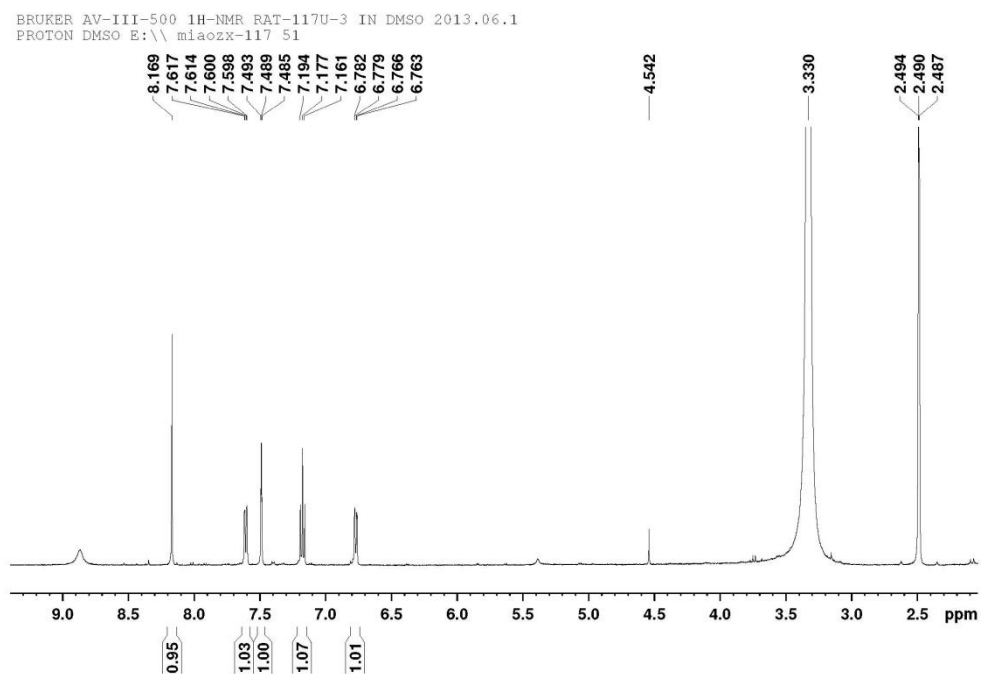

Fig. S3-2  $^1\text{H}$  NMR spectrum of M3 (500 MHz, DMSO, 25  $^\circ\text{C}$ ).

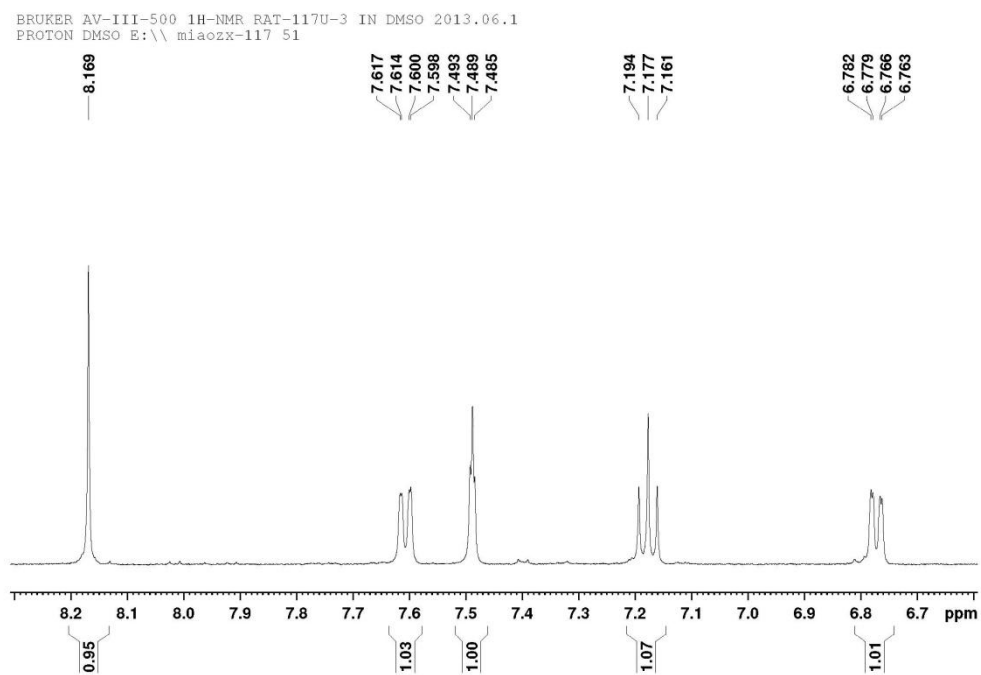

Fig. S3-3 COSY NMR spectrum of M3 (500 MHz, DMSO, 25 °C).

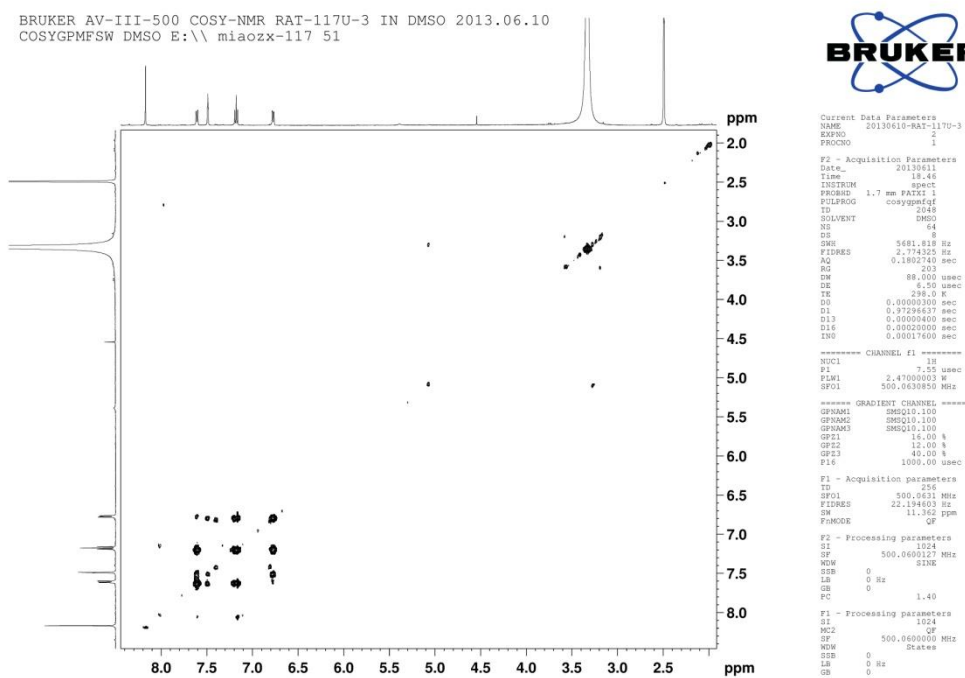

Fig. S3-4 COSY NMR spectrum of M3 (500 MHz, DMSO, 25 °C).

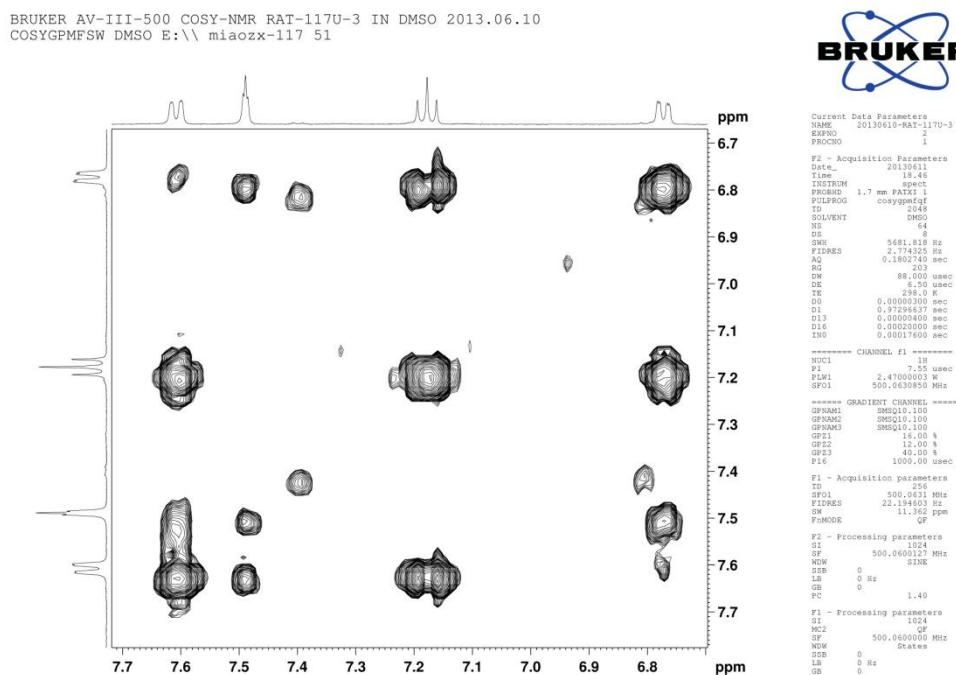

Fig. S3-5 HSQC NMR spectrum of M3 (500 MHz, DMSO, 25 °C).

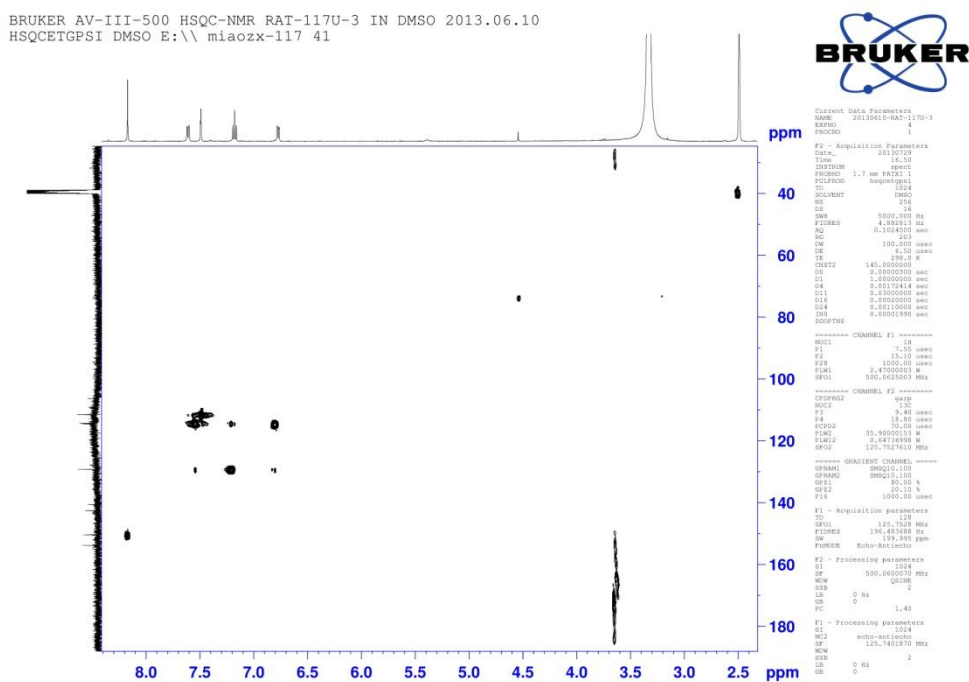

Fig. S3-6 HSQC NMR spectrum of M3 (500 MHz, DMSO, 25 °C).

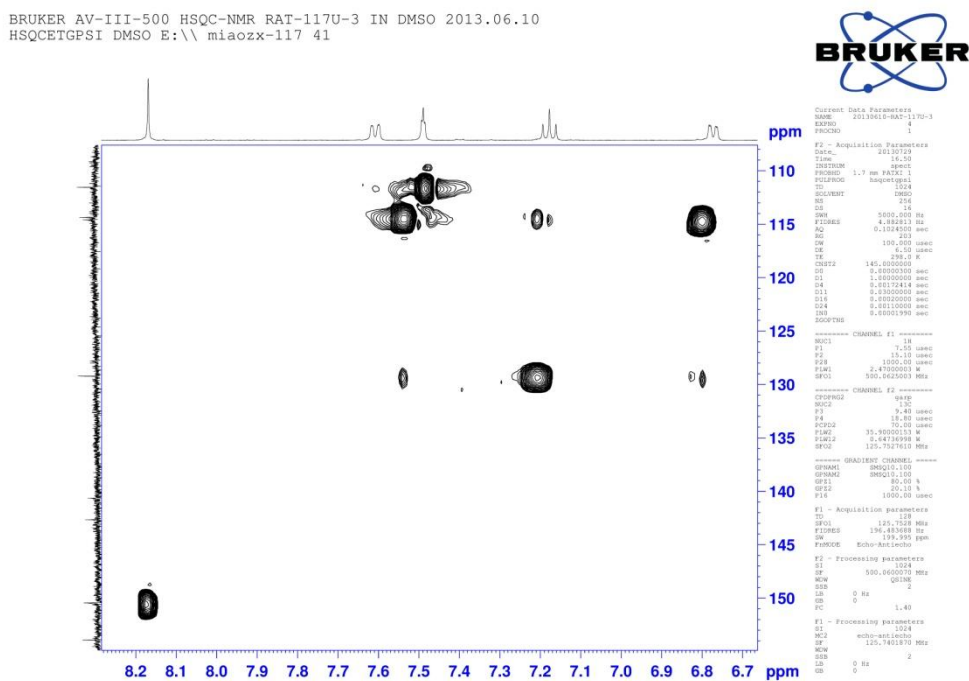

Fig. S3-7 HMBC NMR spectrum of M3 (500 MHz, DMSO, 25 °C).

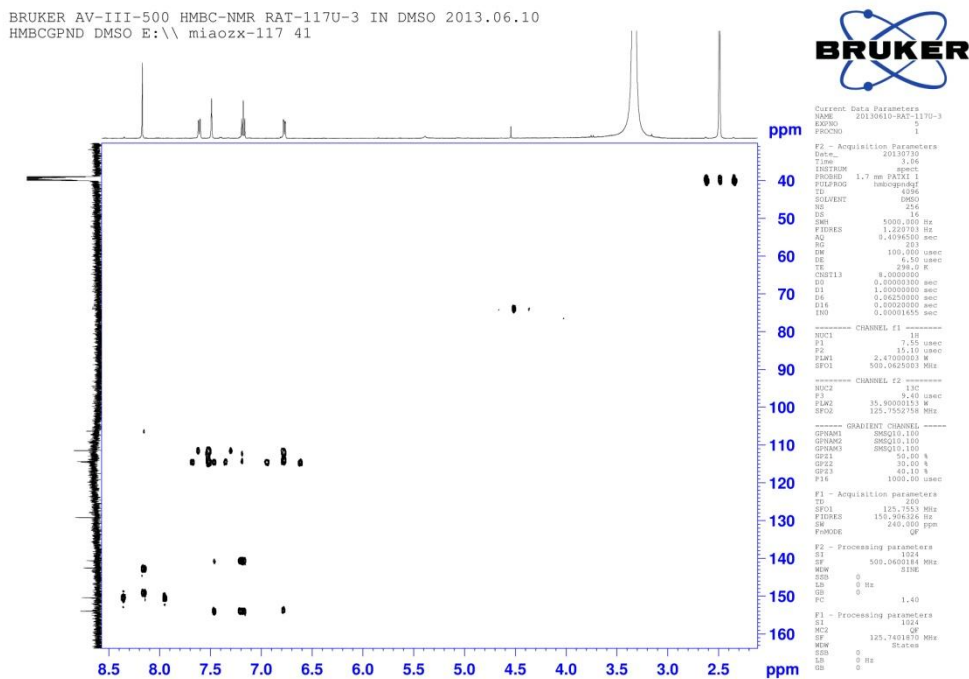

Fig. S3-8 HMBC NMR spectrum of M3 (500 MHz, DMSO, 25 °C).

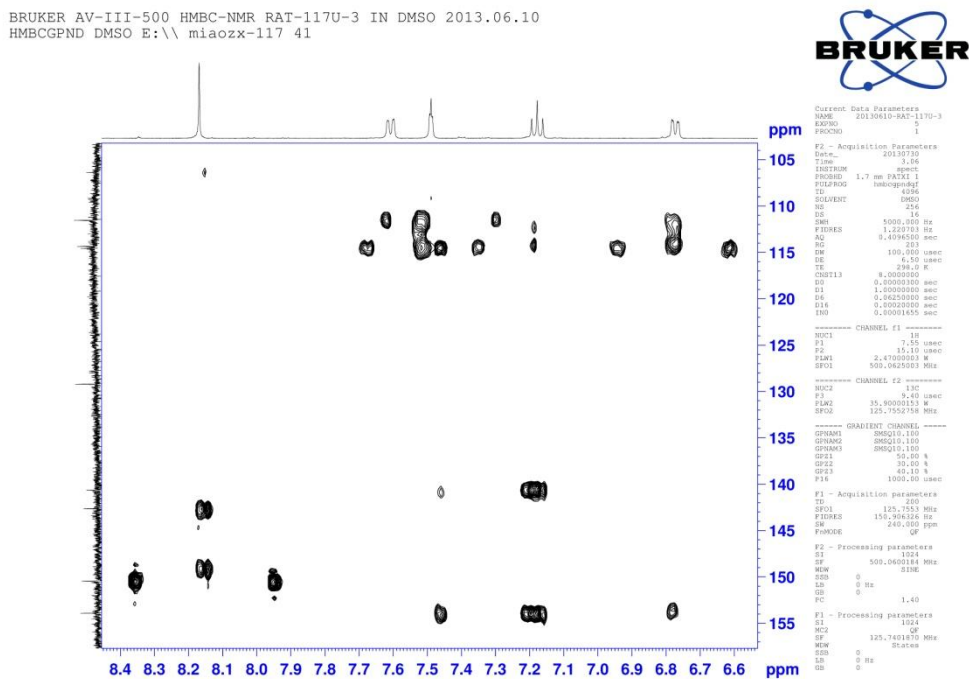

Supplement: pone.0127583.s003.pdf [file pone.0127583.s003.pdf]
